# Supplementary material for: Stoichiometry-controlled structural and functional variation in two photochromic iodoargentates with a fast and wide range response
Source: Royal Society of Chemistry journal article supplement (doi:10.1039/c6dt03105f), 2016-01-01
Supplement: c6dt03105f1.pdf [file c6dt03105f1.pdf]

## Stoichiometry-controlled structural and functional variation in two photochromic iodoargentates with fast and wide range response

Tan-Lai Yu, Peng-Fei Hao, Jun-Ju Shen, Hui-Hui Li and Yun-Long Fu\*

School of Chemistry & Material Science, Shanxi Normal University, Linfen 041004, P. R. China

### Supporting Information (SI)

Supporting Information of two compounds: The asymmetric unit diagram of **1** and **2** (Fig. S1), Topological network of **2** (Fig. S2), Infrared Spectroscopy (Fig. S3), X-ray powder diffraction (XRPD) patterns (Fig. S4) and Selected bond lengths (Å) and angles (°) for **1** and **2** (Tables S1), Optical absorption comparison of **1**, **2** and [MV][Ag<sub>2</sub>I<sub>4</sub>] (Tables S2).

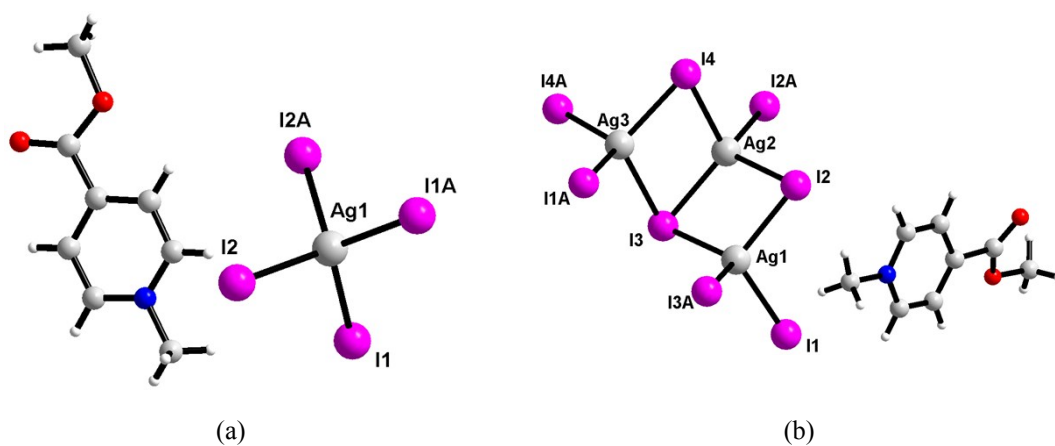

Fig. S1 The asymmetric unit diagram of **1** (a) and **2** (b).

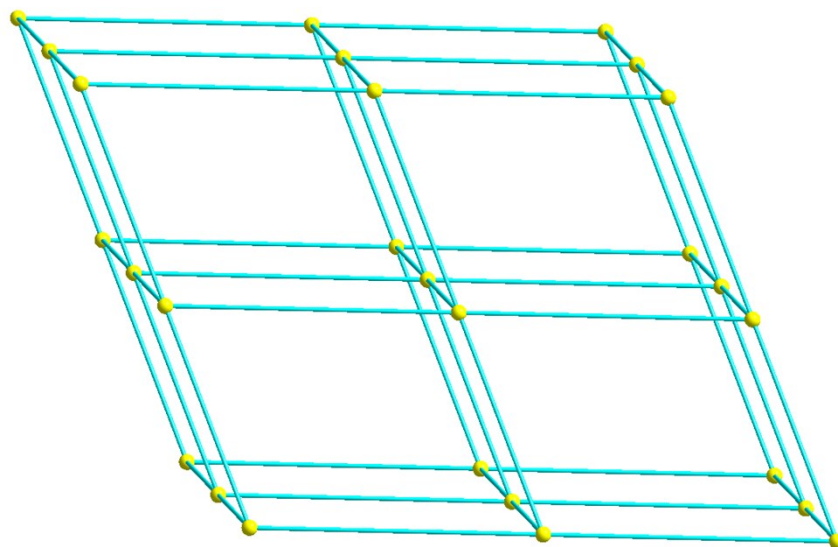

Fig. S2 View of the pcu topological network in the compound **2**.

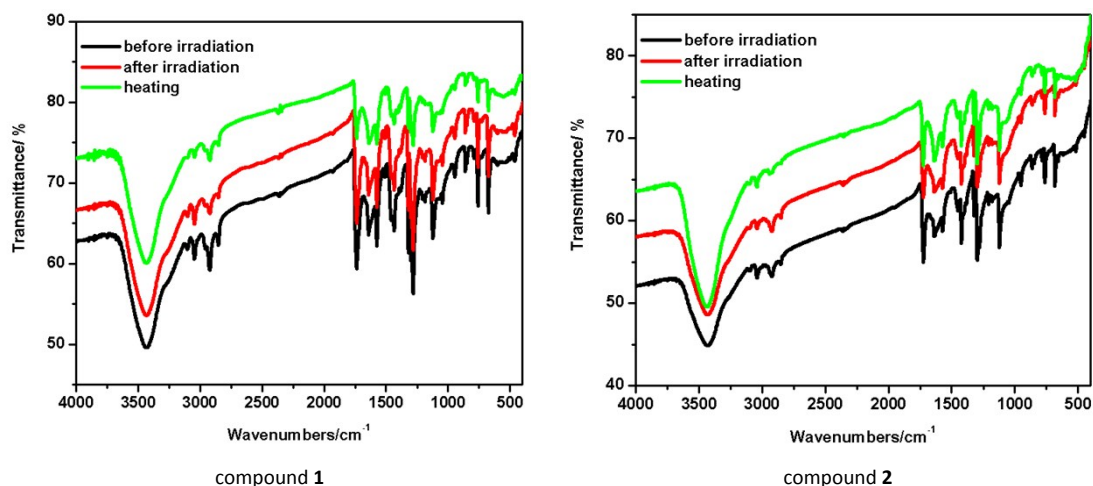

Fig. S3 IR spectra of 1 and 2.

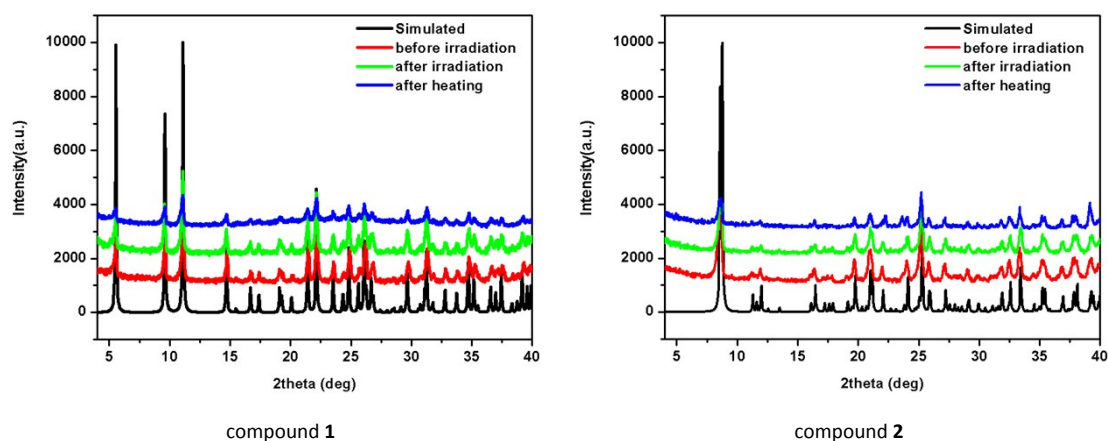

Fig. S4 X-ray powder diffraction (XRPD) patterns of 1 and 2.

Table S1 Selected bond lengths (Å) and angles (°) for 1 and 2 at 293(2) K

| Compound 1          |            |                   |            |
|---------------------|------------|-------------------|------------|
| Ag(1)-I(1)          | 2.8245(13) | Ag(1)-I(2)#1      | 2.9056(12) |
| Ag(1)-I(1)#1        | 2.8351(13) | Ag(1)-I(2)        | 2.9085(12) |
| I(1)-Ag(1)-I(1)#1   | 116.36(5)  | I(1)-Ag(1)-I(2)   | 106.91(4)  |
| I(1)-Ag(1)-I(2)#1   | 108.54(4)  | I(1)#1-Ag(1)-I(2) | 105.48(4)  |
| I(1)#1-Ag(1)-I(2)#1 | 106.70(4)  | I(2)#1-Ag(1)-I(2) | 113.00(4)  |
| Compound 2          |            |                   |            |
| Ag(1)-I(1)          | 2.7739(14) | Ag(1)-I(3)#1      | 3.0173(15) |
| Ag(1)-I(3)          | 2.8528(13) | Ag(1)-Ag(1)#1     | 3.169(2)   |
| Ag(1)-I(2)          | 2.8563(14) | Ag(2)-I(4)        | 2.8631(14) |
| Ag(2)-I(2)          | 2.8766(14) | Ag(2)-I(2)#2      | 2.8637(14) |
| Ag(2)-I(3)          | 2.8807(14) | Ag(3)-I(4)        | 2.8530(15) |
| Ag(3)-I(1)#1        | 2.7652(15) | Ag(3)-I(3)        | 3.0097(16) |
| Ag(3)-I(4)#3        | 2.8444(14) | Ag(2)-Ag(2)#2     | 3.161(2)   |
| Ag(1)-Ag(2)         | 3.3477(16) | Ag(2)-Ag(3)       | 3.2135(18) |
| I(1)-Ag(1)-I(3)     | 117.58(5)  | I(1)-Ag(1)-I(3)#1 | 102.71(4)  |

|                     |           |                   |           |
|---------------------|-----------|-------------------|-----------|
| I(1)-Ag(1)-I(2)     | 110.82(5) | I(3)-Ag(1)-I(3)#1 | 114.72(4) |
| I(3)-Ag(1)-I(2)     | 109.10(4) | I(2)-Ag(1)-I(3)#1 | 100.52(4) |
| I(4)-Ag(2)-I(2)#2   | 99.52(4)  | I(4)-Ag(2)-I(3)   | 114.53(4) |
| I(4)-Ag(2)-I(2)     | 105.56(4) | I(2)#2-Ag(2)-I(3) | 116.57(5) |
| I(2)#2-Ag(2)-I(2)   | 112.33(4) | I(2)-Ag(2)-I(3)   | 107.76(4) |
| I(1)#1-Ag(3)-I(4)#3 | 118.72(5) | I(1)#1-Ag(3)-I(3) | 103.11(4) |
| I(1)#1-Ag(3)-I(4)   | 113.89(5) | I(4)#3-Ag(3)-I(3) | 103.79(4) |
| I(4)#3-Ag(3)-I(4)   | 105.83(4) | I(4)-Ag(3)-I(3)   | 110.97(5) |

Symmetry code:

For 1: #1 -x+y,y,z-1/2; #2 -x+y,y,z+1/2. For 2: #1 -x+1/2,-y+1/2,-z+1; #2 -x,y,-z+1/2; #3 -x,-y+1,-z+1.

**Table S2** Optical absorption comparison of **1**, **2** and [MV][Ag<sub>2</sub>I<sub>4</sub>].

| Compounds                                   | Inorganic moiety                                         | Color       | visible absorption band edges | Intermolecular Charge transfer | photo-induced electron transfer | Photochromism |
|---------------------------------------------|----------------------------------------------------------|-------------|-------------------------------|--------------------------------|---------------------------------|---------------|
| [MV][Ag <sub>2</sub> I <sub>4</sub> ]       | (Ag <sub>2</sub> I <sub>4</sub> ) <sup>2-</sup> chain    | Red         | 610 nm                        | Strong                         | No                              | No            |
| [MCMP][AgI <sub>2</sub> ] (1)               | (Ag <sub>2</sub> I <sub>4</sub> ) <sup>2-</sup> chain    | Dark yellow | 540 nm                        | Weak                           | Yes                             | Yes           |
| [MCMP][Ag <sub>3</sub> I <sub>4</sub> ] (2) | (Ag <sub>3</sub> I <sub>4</sub> ) <sup>-</sup> framework | Pale yellow | 492 nm                        | Weak                           | Yes                             | Yes           |
